# Supplementary material
Source: PubMed Central journal article supplement (PMC9053246)
Supplement: NIHMS1573940-supplement-Supplemental_Material.pdf [file NIHMS1573940-supplement-Supplemental_Material.pdf]

## Supplemental Materials

Supplemental Figure 1. Diagram of study flow

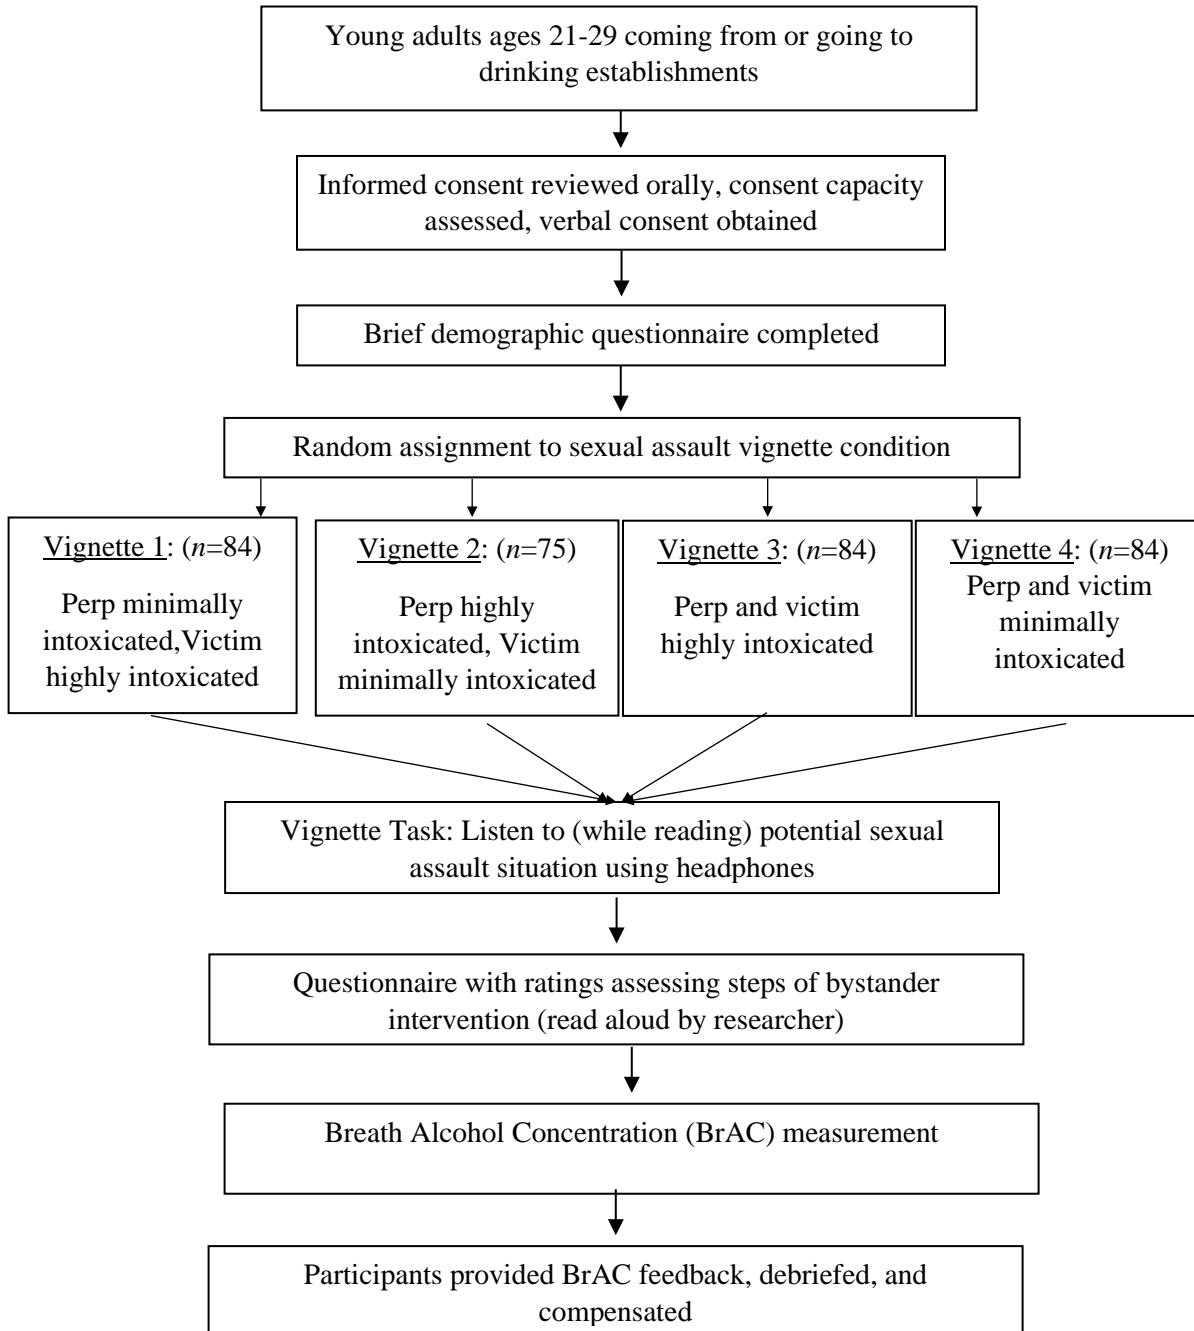

**Supplemental Figure 2.** *Diagram of field study data collection setting*

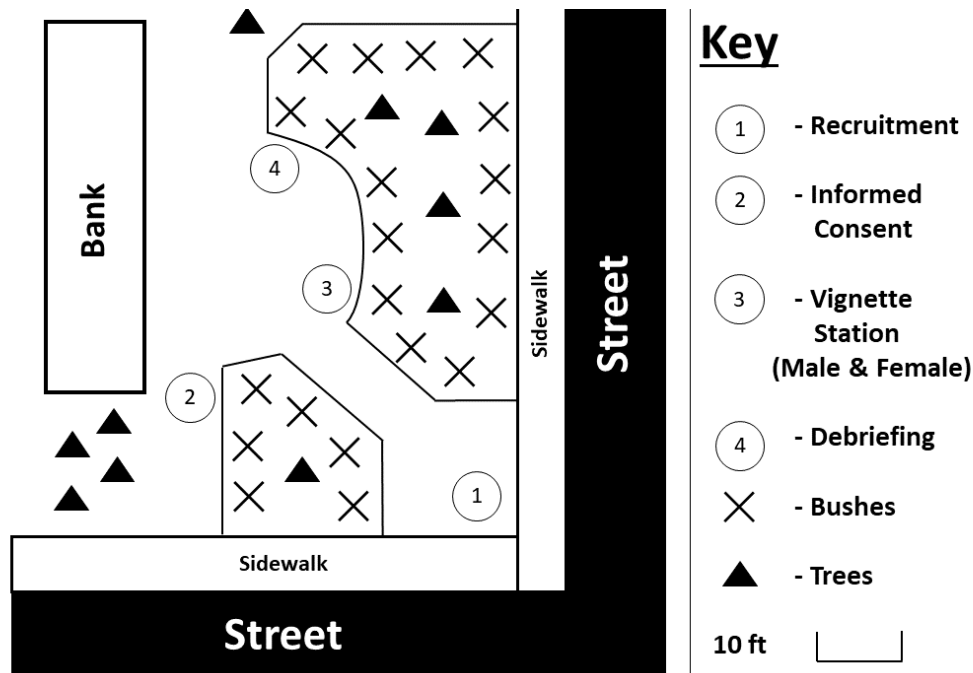

**Notes:** <sup>1</sup>Research assistants #1 and #2 (one male and female) were positioned at Recruitment station. All passersby were asked if they were interested in participating in a study about intoxication and social interactions. Interested passersby were moved to the Informed Consent station; interested passersby in groups were separated such only one individual completed each study component at a time.

<sup>2</sup>At the Informed Consent station, research assistant #3 read aloud informed consent while participants read written documentation.

<sup>3</sup>At the Vignette station, a gender-matched research assistant (research assistants #4 and 5) read each item aloud and clarified scale anchor points. Participants recorded their responses to each item on their form privately.

<sup>4</sup> Research assistant #6 was positioned at the Debriefing station.

## Sexual Assault Vignette Scripts

*\*Note: italicized and underlined text denotes differences between conditions*

**Condition 1 (Perpetrator not intoxicated, Victim intoxicated):** You are at a house party with your friend, Vicki. Music is playing and people are having a good time. From across the room, you spot your friend, Pete, and decide to introduce Vicki to Pete. You think the two of them might get along well, since both are into similar sports, both have similar views on politics, and both are from similar family backgrounds. After introductions, it is clear Vicki and Pete are getting along well, so you leave the two of them to mingle with other people at the party. You begin talking with a group of people who are discussing your favorite band. *An hour later, you notice Vicki drinking several shots of liquor as part of a drinking contest while Pete cheers her on. You ask Pete if he plans to join in the contest, but Pete replies he is just going to stick to his one beer tonight.* Later in the evening, you see Pete and Vicki heading to a separate room away from the party. *You notice that Vicki is stumbling and having a very hard time walking.* As you and a group of people walk by the open door on your way to the back porch, you see Pete and Vicki kissing and making out on the bed. Next, you notice that Pete is unzipping his pants and getting on top of Vicki. Vicki pushes him away, but Pete continues to climb on top of her. You hear Pete say to Vicki, “Come on, stop being such a tease.”

**Condition 2 (Perpetrator intoxicated, Victim not intoxicated):** You are at a house party with your friend, Vicki. Music is playing and people are having a good time. From across the room, you spot your friend, Pete, and decide to introduce Vicki to Pete. You think the two of them might get along well, since both are into similar sports, both have similar views on politics, and both are from similar family backgrounds. After introductions, it is clear Vicki and Pete are getting along well, so you leave the two of them to mingle with other people at the party. You begin talking with a group of people who are discussing your favorite band. *An hour later, you notice Pete drinking several shots of liquor as part of a drinking contest while Vicki cheers him on. You ask Vicki if she plans to join in the contest, but Vicki replies she is just going to stick to her one beer tonight.* Later in the evening, you see Pete and Vicki heading to a separate room away from the party. *You notice that Pete is stumbling and having a very hard time walking.* As you and a group of people walk by the open door on your way to the back porch, you see Pete and Vicki kissing and making out on the bed. Next, you notice that Pete is unzipping his pants and getting on top of Vicki. Vicki pushes him away, but Pete continues to climb on top of her. You hear Pete say to Vicki, “Come on, stop being such a tease.”

**Condition 3 (Perpetrator intoxicated, Victim intoxicated):** You are at a house party with your friend, Vicki. Music is playing and people are having a good time. From across the room, you spot your friend, Pete, and decide to introduce Vicki to Pete. You think the two of them might get along well, since both are into similar sports, both have similar views on politics, and both are from similar family backgrounds. After introductions, it is clear Vicki and Pete are getting along well, so you leave the two of them to mingle with other people at the party. You begin talking with a group of people who are discussing your favorite band. *An hour later, you notice Pete and Vicki drinking several shots of liquor as part of a drinking contest while others cheer them on.* Later in the evening, you see Pete and Vicki heading to a separate room away from the party. *You notice that Pete and Vicki are stumbling and having a very hard time walking.* As you

and a group of people walk by the open door on your way to the back porch, you see Pete and Vicki kissing and making out on the bed. Next, you notice that Pete is unzipping his pants and getting on top of Vicki. Vicki pushes him away, but Pete continues to climb on top of her. You hear Pete say to Vicki, “Come on, stop being such a tease.”

**Condition 4 (Perpetrator non intoxicated, Victim not intoxicated):** You are at a house party with your friend, Vicki. Music is playing and people are having a good time. From across the room, you spot your friend, Pete, and decide to introduce Vicki to Pete. You think the two of them might get along well, since both are into similar sports, both have similar views on politics, and both are from similar family backgrounds. After introductions, it is clear Vicki and Pete are getting along well, so you leave the two of them to mingle with other people at the party. You begin talking with a group of people who are discussing your favorite band. An hour later, you notice a group of people drinking several shots of liquor as part of a drinking contest while Pete and Vicki cheer them on. You ask Pete and Vicki if they plan to join in the contest, but both reply they are just going to stick to their one beer tonight. Later in the evening, you see Pete and Vicki heading to a separate room away from the party. As you and a group of people walk by the open door on your way to the back porch, you see Pete and Vicki kissing and making out on the bed. Next, you notice that Pete is unzipping his pants and getting on top of Vicki. Vicki pushes him away, but Pete continues to climb on top of her. You hear Pete say to Vicki, “Come on, stop being such a tease.”
